# Supplementary material for: Patterned Co-culture of Live Cells on a Microchip by Photocrosslinking with Benzophenone
Source: Springer Nature journal article supplement (doi:10.2116/analsci.32.113), 2016-01-01
Supplement: 44211_2016_32010019_MOESM1_ESM.pdf [file 44211_2016_32010019_MOESM1_ESM.pdf]

### Supporting Information

Table S1 Conditions of cell patterning by UV irradiation

| Objective lens | 10 ×          |               | 4 ×           |               |
|----------------|---------------|---------------|---------------|---------------|
|                | Cell fixation | Survival rate | Cell fixation | Survival rate |
| 2 min          | good          | 88%           | none          | -             |
| 3 min          | good          | 0%            | poor          | 99%           |
| 4 min          | good          | 0%            | good          | 99%           |
